# Supplementary material for: FLT3 is implicated in cytarabine transport by human equilibrative nucleoside transporter 1 in pediatric acute leukemia
Source: PubMed Central journal article supplement (PMC5226548; doi:10.18632/oncotarget.10448), 2016-07-06
Supplement: oncotarget-07-49786-s001.pdf [file oncotarget-07-49786-s001.pdf]

## FLT3 is implicated in cytarabine transport by Human Equilibrative Nucleoside Transporter 1 in pediatric acute leukemia

### Supplementary Materials

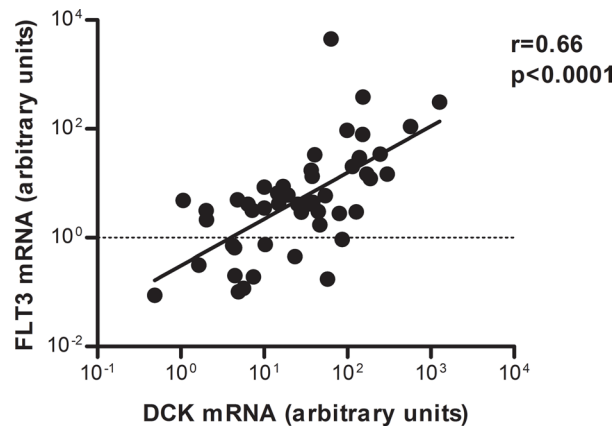

**Supplementary Figure S1: Correlation between *DCK* and *FLT3* mRNA expression in pediatric leukemia samples.** Relative *DCK* mRNA levels of cells from 50 pediatric patients with acute leukemia were plotted against the levels of *FLT3* mRNA in the same samples. Correlation coefficient and level of significance are shown in the figure.

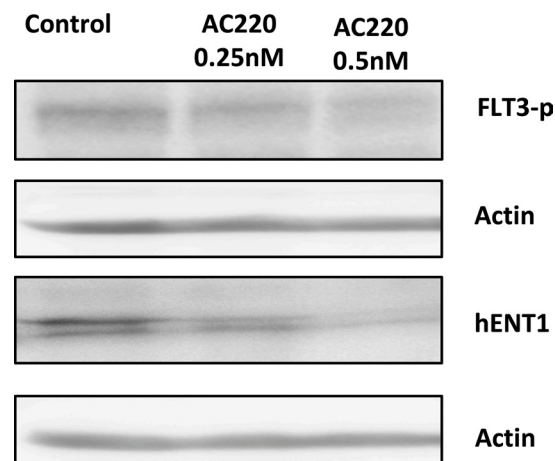

**Supplementary Figure S2: Western blot analysis of hENT1 and phospho-FLT3 (Tyr591) were performed in cell extracts from MV4-11 cells.** Cells were incubated in the presence of AC220 (0.25 nM and 0.5 nM) for 16 h. A representative Western blot out of three independent experiments is shown in each panel.

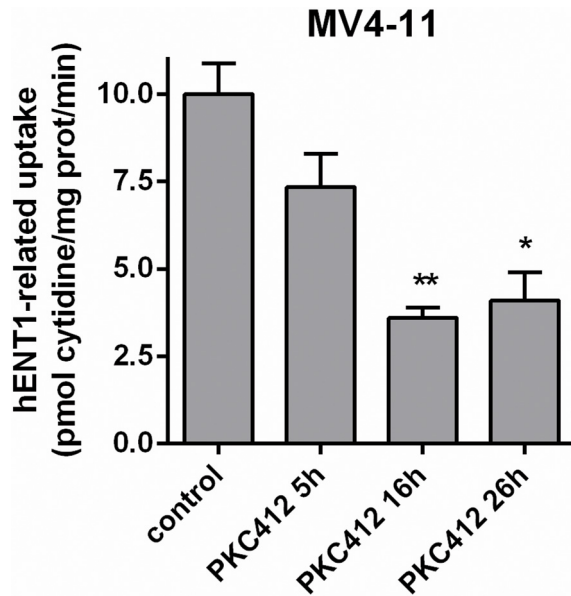

**Supplementary Figure S3: Effect of FLT3 inhibition in hENT1-related activity.** hENT1-mediated [<sup>3</sup>H]cytidine uptake (1 μM, 1 min) was measured in MV4-11 cells in the presence of PKC412 for 5, 16 or 26 h. Mean ± SEM from 3 independent experiments, each conducted in quadruplicate, is shown. Statistical significance of the difference relative to control cells is as follows: \**p* < 0.1; \*\**p* < 0.01.

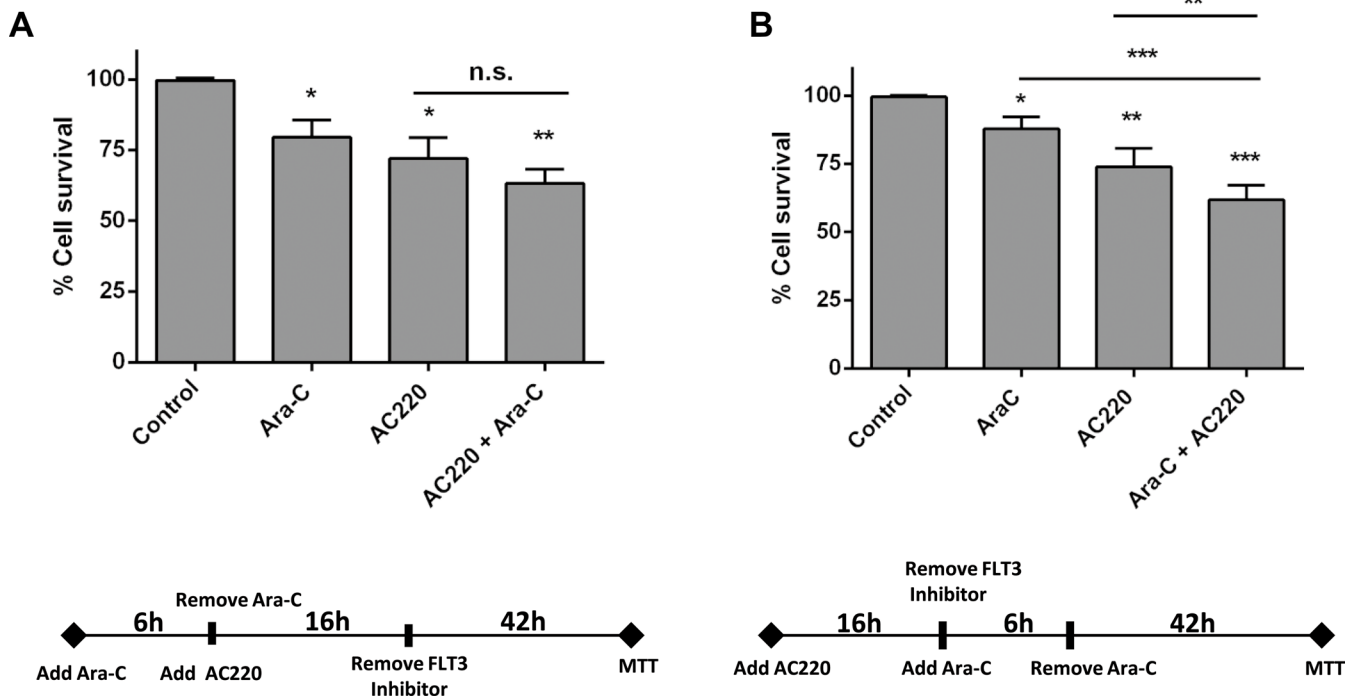

**Supplementary Figure S4: Effect of AC220 on the cytotoxicity induced by Ara-C.** Cell viability was determined by MTT assays when (A) MV4-11 cells were treated first with the FLT3 inhibitor AC220 for 16 h, then AC220 was removed from the medium and this was followed by a 6 h exposure to Ara-C (10 μM), and (B) MV4-11 cells were cultured first with Ara-C (10 μM) for 6 h, then Ara-C removed from the medium and followed by a 16 h exposure to AC220. Data are expressed as percentage of survival ± SEM of triplicate measurements from six independent experiments. Statistical significance of the differences relative to control cells is as follows: \**p* < 0.1; \*\**p* < 0.01; \*\*\**p* < 0.001. Interexperimental differences were similarly determined for Ara-C and PKC412 treated cells as indicated in the figures.

**Supplementary Table S1: Absolute expression of hNTs under experimental conditions**

| RNA expression (log copies/ $\mu$ g RNA) |                 |                 |                 |
|------------------------------------------|-----------------|-----------------|-----------------|
| <i>hNT</i>                               | MV4-11          | SEM             | K562            |
| <i>hCNT1 (SLC28A1)</i>                   | 3.04 $\pm$ 0.11 | 2.61 $\pm$ 0.05 | 2.82 $\pm$ 0.06 |
| <i>hCNT2 (SLC28A2)</i>                   | 2.88 $\pm$ 0.01 | 3.06 $\pm$ 0.04 | 2.69 $\pm$ 0.11 |
| <i>hCNT3 (SLC28A3)</i>                   | 5.06 $\pm$ 0.01 | 1.33 $\pm$ 0.01 | 1.69 $\pm$ 0.09 |
| <i>hENT1 (SLC29A1)</i>                   | 5.05 $\pm$ 0.10 | 5.30 $\pm$ 0.01 | 5.52 $\pm$ 0.17 |
| <i>hENT2 (SLC29A2)</i>                   | 2.55 $\pm$ 0.03 | 3.79 $\pm$ 0.06 | 4.17 $\pm$ 0.11 |

mRNA expression (log copies/ $\mu$ g RNA) quantified by absolute RQ-PCR.

**Supplementary Table S2: Oligonucleotides and probes used in RQ-PCR to measure different nucleoside transporters, metabolizing enzymes and *FLT3* expression levels**

| target gene    | encoded protein | sense 5-3'/antisense 5-3'                                    | probes 5'FAM-TAMRA3'            |
|----------------|-----------------|--------------------------------------------------------------|---------------------------------|
| <i>SLC28A1</i> | hCNT1           | TGATTTCTTGGAAGCCTGGA/<br>TGCTCCTGATCTCTGCGG                  | AAGGCCAGCTCCCTAGGAGTGACTTGAG    |
| <i>SLC28A2</i> | hCNT2           | AAGTAGAGCCTGAGGGAAGCAA/<br>GCCAGTCCATCCCC                    | AGGACTGACGCACAAGGAACACAGCC      |
| <i>SLC28A3</i> | hCNT3           | GAGCTGTGCAAAGCAGGGA/<br>TGGCGAATCCTGCTCAACTGTG               | CACACAAACACCAGGATGAAGAACAGG     |
| <i>SLC29A1</i> | hENT1           | GCAAAGGAGAGGAGCCAAGA/<br>TTCATTGGTGGGCTGAGAGT                | CAGGCAAAGAGGAATCTGGAGTTTCAGTCTC |
| <i>SLC29A2</i> | hENT2           | CCCTGGATCTTGACCTGGAG/<br>GGTTTTCCTGGCTTCTGGG                 | AGGAGCCGGAATCAGAGCCAGATGA       |
| <i>DCK</i>     | DCK             | <i>Hs01040726_m1 (Applied Biosystems, Life Technologies)</i> |                                 |
| <i>FLT3</i>    | FLT3            | <i>Hs00174690_m1 (Applied Biosystems, Life Technologies)</i> |                                 |
